# Supplementary material for: Effectiveness of online interventions in preventing depression: a protocol for systematic review and meta-analysis of randomised controlled trials
Source: PubMed Central journal article supplement — BMJ Open. 2018 Nov 28;8(11):e022012. doi: 10.1136/bmjopen-2018-022012 (PMC6278812; doi:10.1136/bmjopen-2018-022012), 2018-11-28
Supplement: bmjopen-2018-022012.draft_revisions.pdf [file bmjopen-2018-022012.draft_revisions.pdf]

# BMJ Open

BMJ Open is committed to open peer review. As part of this commitment we make the peer review history of every article we publish publicly available.

When an article is published we post the peer reviewers' comments and the authors' responses online. We also post the versions of the paper that were used during peer review. These are the versions that the peer review comments apply to.

The versions of the paper that follow are the versions that were submitted during the peer review process. They are not the versions of record or the final published versions. They should not be cited or distributed as the published version of this manuscript.

BMJ Open is an open access journal and the full, final, typeset and author-corrected version of record of the manuscript is available on our site with no access controls, subscription charges or pay-per-view fees (<http://bmjopen.bmj.com>).

If you have any questions on BMJ Open's open peer review process please email [editorial.bmjopen@bmj.com](mailto:editorial.bmjopen@bmj.com)

# BMJ Open

## Effectiveness of online interventions in preventing depression: A protocol for systematic review and meta-analysis of randomized controlled trials.

|                               |                                                                                                                                                                                                                                                                                                                                                                                                                                                                                                                                                                                                                                                                                                                                                                                                                                                                     |
|-------------------------------|---------------------------------------------------------------------------------------------------------------------------------------------------------------------------------------------------------------------------------------------------------------------------------------------------------------------------------------------------------------------------------------------------------------------------------------------------------------------------------------------------------------------------------------------------------------------------------------------------------------------------------------------------------------------------------------------------------------------------------------------------------------------------------------------------------------------------------------------------------------------|
| Journal:                      | <i>BMJ Open</i>                                                                                                                                                                                                                                                                                                                                                                                                                                                                                                                                                                                                                                                                                                                                                                                                                                                     |
| Manuscript ID                 | bmjopen-2018-022012                                                                                                                                                                                                                                                                                                                                                                                                                                                                                                                                                                                                                                                                                                                                                                                                                                                 |
| Article Type:                 | Protocol                                                                                                                                                                                                                                                                                                                                                                                                                                                                                                                                                                                                                                                                                                                                                                                                                                                            |
| Date Submitted by the Author: | 30-Jan-2018                                                                                                                                                                                                                                                                                                                                                                                                                                                                                                                                                                                                                                                                                                                                                                                                                                                         |
| Complete List of Authors:     | Rigabert, Alina; Universidad Loyola Andalucía, Psychology; Universidad Loyola<br>Motrico, Emma; Universidad Loyola Andalucía, Psychology<br>Moreno-Peral, Patricia; Prevention and Health Promotion Research Network (redIAPP), ISCIII,; Research Unit of the Health District of Primary Care Málaga-Guadalhorce<br>Resurrección, Davinia M.; Universidad Loyola Andalucía, Psychology<br>Conejo-Cerón, Sonia; Prevention and Health Promotion Research Network (redIAPP), ISCIII,; Research Unit of the Health District of Primary Care Málaga-Guadalhorce<br>Navas-Campaña, Desirée; Prevention and Health Promotion Research Network (redIAPP), ISCIII,; Research Unit of the Health District of Primary Care Málaga-Guadalhorce<br>Bellón, Juan A.; Health District of Primary Care Málaga-Guadalhorce, SAS, ; Biomedical Research Institute of Malaga (IBIMA), |
| Keywords:                     | Depression & mood disorders < PSYCHIATRY, Prevention, Online, randomized controlled trial, Systematic review, Meta-analysis                                                                                                                                                                                                                                                                                                                                                                                                                                                                                                                                                                                                                                                                                                                                         |
|                               |                                                                                                                                                                                                                                                                                                                                                                                                                                                                                                                                                                                                                                                                                                                                                                                                                                                                     |

SCHOLARONE™  
Manuscripts

1  
2  
3 **Title: Effectiveness of online interventions in preventing depression: A protocol for systematic**  
4 **review and meta-analysis of randomized controlled trials.**  
5

6  
7  
8 **Authors: Alina Rigabert<sup>1</sup>, Emma Motrico <sup>1,2</sup>, Patricia Moreno-Peral<sup>2,3,4</sup>, Davinia M. Resurrección<sup>1</sup>, Sonia**  
9 **Conejo-Cerón<sup>2,3,4</sup>, Desirée Navas-Campaña<sup>2,3,4</sup>, and Juan Á. Bellón<sup>2,3,4,5,6</sup>**  
10

11  
12 <sup>1</sup> Departamento de Psicología, Universidad Loyola Andalucía, Spain.  
13

14 <sup>2</sup> Prevention and Health Promotion Research Network (redIAPP), ISCIII, Spain.  
15

16 <sup>3</sup> Research Unit of the Health District of Primary Care Málaga-Guadalhorce, Spain.  
17

18 <sup>4</sup> Biomedical Research Institute of Malaga (IBIMA), Spain.  
19

20 <sup>5</sup> El Palo Health Centre, Andalusian Health Service (SAS), Málaga, Spain.  
21

22 <sup>6</sup> Department of Public Health and Psychiatry, University of Málaga (UMA), Spain.  
23

24  
25  
26 **Correspondence to:**

27  
28  
29 Dr. Emma Motrico  
30

31  
32 Departamento de Psicología  
33 Universidad Loyola Andalucía  
34 41014 Sevilla, Spain  
35 [emotrico@uloyola.es](mailto:emotrico@uloyola.es)  
36  
37  
38  
39  
40  
41  
42  
43  
44  
45  
46  
47  
48  
49  
50  
51  
52  
53  
54  
55  
56  
57  
58  
59  
60

1  
2  
3 ABSTRACT

4 **Introduction:** Although evidence exists for the efficacy of psychosocial interventions in preventing  
5 depression, little is known about its prevention through online interventions. The objective of this study will  
6 be to conduct a systematic review and meta-analysis of randomized controlled trials assessing the  
7 effectiveness of online interventions in preventing depression in heterogeneous populations.  
8  
9

10 **Methods and analysis:** We will conduct a systematic review and meta-analysis of randomized controlled  
11 trials that will be identified through searches of PubMed, PsycINFO, WOS, Scopus, OpenGrey, Cochrane  
12 Central Register of Controlled Trials (CENTRAL), ClinicalTrials.gov and Australia New Zealand Clinical  
13 Trials Register (ANZCTR). We will also search the reference lists provided in relevant studies and reviews.  
14 Experts in the field will be contacted to obtain more references. Two independent reviewers will assess the  
15 eligibility criteria of all articles, extract data and determine their risk of bias (Cochrane Collaboration Tool).  
16 Baseline depression will be required to have been discarded through standardized interviews or validated  
17 self-reports with standard cut-off points. The outcomes will be the incidence of new cases of depression  
18 or/and the reduction of depressive symptoms as measured by validated instruments. Pooled standardized  
19 mean differences will be calculated using random-effect models. Heterogeneity and publication bias will be  
20 estimated. Predefined sensitivity and subgroup analyses will be performed. If heterogeneity is relevant,  
21 random-effect meta-regression will be performed.  
22  
23  
24  
25  
26  
27

28 **Ethics and dissemination:** The results will be disseminated through peer-reviewed publication and will  
29 be presented at a professional conference. Ethical assessment is not required as we will search and  
30 assess existing sources of literature.  
31  
32

33 **PROSPERO Registration number:** CRD42014014804.  
34  
35  
36  
37  
38  
39  
40  
41  
42  
43  
44  
45  
46  
47  
48  
49  
50  
51  
52  
53  
54  
55  
56  
57  
58  
59  
60

**Strengths and limitations of this study**

- This is the first systematic review and meta-analysis of randomized controlled trials assessing the effectiveness of online interventions in preventing depression in a heterogeneous population.
- The study will be conducted according to PRISMA-P guidelines for protocols, addressing those aspects that the PRISMA-P consensus suggests for a SR-MA to have the highest scientific quality.
- The effect size, robustness and quality of evidence found in this meta-analysis will help determine whether depression can be prevented through online interventions.
- This study will have the limitations inherent to any systematic review and meta-analysis, such as the loss of information on outcome variables, or the assumption that the evaluation techniques are consistent across studies.
- The number and quality of the RCTs included, heterogeneity, and occurrence of publication bias might limit the interpretation of results. Yet, the magnitude and direction of these potential limitations will be assessed.

## INTRODUCTION

Depression is a common, resource-consuming and disabling mental disorder that reduces life expectancy [1]. There are currently 322 million people with depression in the world [2]. The average lifetime and 12-month prevalence estimates of DSM-IV Major Depression Episode in high-income countries are 14.6% and 5.5%, respectively [3]. In the last ten years, the burden of major depression measured as years lived with disability (YLD) increased by 17.8%, ranking third in the world in disease burden [3] and will rank first in high-income countries by 2030 [4]. In addition, depression is the primary cause of disability in the world attributable to mental and substance use disorders [5].

Current treatments for depression show several constraints such as accessibility issues, limited efficacy, or lack of adherence [6–8]. Even if it was possible to provide appropriate treatments to all persons affected by a depressive disorder, the effect on averting YLD would be limited because of the steady influx of new cases of depression [9]. For all these reasons the burden of depression can only be reduced by 20-30% [10]. Prevention may offer new possibilities to reduce the disease burden of depressive disorders [11,12].

Hundreds of randomized controlled trials (RCTs) and dozens of systematic reviews / meta-analysis (SR/MA) have been published on interventions to prevent depression [13–17]. A systematic review of SR/MA of psychological and/or educational interventions to prevent depression included 12 SR/MA (156 non-repeated trials and 56,158 participants) and found a small-moderate preventive effect [18]. If preventive interventions reach a significant part of the population, even if this effect size is small, the impact on health, quality of life and healthcare costs could be relevant. From this point of view, scalability is crucial to prevention interventions. Solutions may leverage technological advances, such as mHealth-based counselling, computer and web-based resources [19].

Interest in online prevention programs for depression has increased substantially in recent years [20–22]. Online interventions offer some advantages over face-to-face interventions for both, patients and the health system. Its advantages include greater intimacy, lower economical costs, the opportunity of joining the intervention at any time and place, easy access to a wider range of people (disabled population, rural areas, etc.) and a reduction in the time of waiting, among others [23–27].

So far, three SR/MA on the effectiveness of online interventions in preventing mental disorders have been published [28, 29, 30]. To our knowledge, these previous reviews have some limitations. One [28] was focused on several mental disorders altogether (Eating, Anxiety, Insomnia, Post-Traumatic Stress, Depression and Common Mental Health Disorders) and included only four trials on the prevention of depression. A limitation was the inclusion of some studies that only reported mean scores and did not clearly state that participants did not exceed clinical cut-offs at baseline, thus making it difficult to separate treatment from prevention. The other [29] was focused on the online cognitive behavioural therapy for subthreshold depression, which restricts its inference for that kind of psychotherapy and only for a type of prevention, indicated prevention; not addressed, thus, universal and selective prevention strategies. In addition new RCTs on online interventions for the prevention of depression have been published [31–35]. The last SR/MA [30] found a small preventive effect of the eHealth interventions to prevent anxiety and

1  
2  
3 depression; however, there were some exclusion criteria which limited their inferences: age (18-64 years),  
4 language (English), date (from 2000) and non-specific population (e.g. post-natal or comorbid). Therefore,  
5 the objective of this study will be to conduct a systematic review and meta-analysis of randomized  
6 controlled trials assessing the effectiveness of online interventions in preventing depression in  
7 heterogeneous populations.  
8  
9

## 10 11 12 **METHODS AND ANALYSIS**

13  
14 We followed PRISMA-P guidelines for reporting systematic reviews and meta-analysis protocols [36]. The  
15 protocol of this study has already been registered with the International Prospective Register of  
16 Systematic Reviews, (PROSPERO) on 20 November 2014 and was last updated on 23 November 2017  
17 (registration number: CRD42014014804).  
18  
19

### 20 21 **Eligibility criteria**

22 The rationale for the inclusion and exclusion criteria outlined below is to obtain a comprehensive overview  
23 of the RCTs performed so far assessing the effectiveness of online interventions in preventing depression  
24 in different populations and settings.  
25  
26

### 27 28 **Study design**

29 We will focus on randomized controlled trials (RCT) since this design provides more evidence on causality  
30 and is considered a gold-standard for clinical trials [34]. Cluster randomized trials will only be included if  
31 there are at least two intervention and control sites and outcomes are reported adjusted for clustering  
32 effect. Controlled non-randomized clinical trials or before-after trials will be excluded.  
33  
34  
35

### 36 37 **Participants and exclusion of depression at baseline**

38 Participants may have any sociodemographic (age, sex, etc.) or clinical (healthy, chronic physical illness,  
39 etc.) characteristic and all settings (community, schools, primary care, etc.) will be considered. To make a  
40 clear distinction between the effectiveness of prevention interventions from that of treatments, baseline  
41 depression will be required to have been discarded through standardized interviews (eg. CIDI) or validated  
42 self-reports with standard cut-off points (eg. BDI-II). In a preventive context, the most useful parameter of  
43 validity of a diagnostic instrument to discard depression at baseline is the “negative predictive value”  
44 (NPV): probability of having a depressive disorder when the result of a diagnostic tool is negative. The  
45 NPV is influenced by three main parameters: cut-off selected, sensitivity associated with that cut-off and  
46 prevalence of anxiety disorders in the reference population of the study. Higher sensitivity, lower cut-off  
47 and prevalence will increase the NPV and minimize false negatives. Structured standardized interviews  
48 generally have greater validity than symptom scales and, therefore, the former are preferable. However,  
49 structured standardized interviews tend to have greater specificity than sensitivity; therefore, false  
50 positives will be minimized at the expense of increasing false negatives. From this point of view, a  
51  
52  
53  
54  
55  
56  
57  
58  
59  
60

1  
2  
3 symptoms scale with a diagnostic threshold associated with high sensitivity could guarantee as valid as a  
4 structured standardized interview, especially if the study is carried out on a reference population with a low  
5 prevalence of depressive disorders, as it is usual in prevention studies.  
6  
7

### 8 9 **Type of interventions**

10 We will only include RCTs assessing the effectiveness of psychological and/or educational and/or social  
11 interventions, since they share the same mechanism of action that facilitates changes in attitudes and  
12 behaviours and because most interventions to prevent depression are of this type. Interventions must be  
13 accessible online and the study should include at least an internet-delivered intervention program. If no  
14 on-line intervention is implemented in any of the experimental arms, the RCT will be excluded. Intervention  
15 arms where active pharmacological therapies are administered will also be excluded.  
16  
17  
18  
19

### 20 21 **Comparators**

22 Comparator groups could be “only assessments”, “no treatment”, “usual care”, “waiting list”, or any type of  
23 active control which has no effect on depression. All types of placebo (psychological or pill) will also be  
24 accepted as comparators. Comparator arms which intervention (psychological, physical or  
25 pharmacological) has been proven to be effective in preventing depression will also be excluded.  
26  
27  
28

### 29 30 **Outcomes**

31 RCTs which primary or secondary outcomes were the incidence of new cases of depression and/or the  
32 reduction of depression symptoms will be included. Outcomes will be required to have been measured by  
33 standardized interviews or validated symptom scales. When more than a symptom scale has been used to  
34 measure outcomes in a RCT, the data from the highest validity scale will be employed, while at equal  
35 validity; the largest effect size will be used. If depression outcomes are measured together with other  
36 outcomes (e.g. anxiety) and data are not provided separately, RCTs will be excluded.  
37  
38  
39  
40  
41

### 42 43 **Information sources and search strategy**

44 A literature search of the following electronic databases will be carried out: PubMed, PsycINFO, WOS and  
45 Scopus. Search will be supplemented by searching for trial protocols on Cochrane Central Register of  
46 Controlled Trials (CENTRAL), ClinicalTrials.gov and Australia New Zealand Clinical Trials Register  
47 (ANZCTR). We will also examine OpenGrey (System for Information on Grey Literature in Europe), where  
48 grey literature is indexed. PROSPERO will be searched for ongoing or recently completed systematic  
49 reviews. To ensure literature saturation we will also review reference lists from relevant systematic reviews  
50 and meta-analysis and those from the RCTs included in our SR/MA. In addition, expert authors will be  
51 contacted in order to identify missing articles in our search. Literature search strategies will be developed  
52 using medical subject headings (MeSH) and text words related to prevention, depression and internet  
53  
54  
55  
56  
57  
58  
59  
60



1  
2  
3 intervention. No limits will be imposed on study publication language or publication date. The search will  
4 be updated toward the end of the review. A draft MEDLINE search strategy is included in supplementary  
5 file 1. We will adapt the MEDLINE strategy to the syntax and subject headings of the other databases.  
6  
7  
8  
9

### 10 **Study selection**

11  
12 The entire selection process will be conducted independently by two reviewers. After elimination of  
13 duplicate studies, all records will be reviewed. Based on their titles and abstracts, the studies that do not  
14 meet inclusion criteria will be ruled out. The full text of the studies selected as potentially relevant will be  
15 reviewed for further assessment. Any disagreements will be discussed and resolved by consensus or by a  
16 third independent reviewer, if necessary. We will seek additional information from corresponding authors  
17 when necessary to resolve questions about eligibility. We will record the reasons for excluding trials. The  
18 reviewers will not be blind to the journal titles or the study authors or institutions. Inter-agreement of the  
19 total selection will be assessed using Kappa [37], which can be interpreted as follows: < 0.20 as poor, 0.21  
20 - 0.40 as fair, 0.41 - 0.60 as moderate, as 0.61 - 0.80 as good and 0.81 - 1.00 as excellent.  
21  
22  
23  
24  
25

### 26 **Data extraction**

27  
28 Data extraction from each eligible study will be conducted independently by two reviewers. Any  
29 disagreement will be discussed and resolved by consensus or by a third independent reviewer. We will  
30 also contact authors to get incomplete or unclear information, where appropriate. Abstracted data will  
31 include author/year and country; setting, target population characteristics (age, sex, etc.) and type of  
32 prevention (universal, selective or indicate); sample size (control/intervention); exclusion of depression  
33 criteria at baseline and validated instruments used; orientation and intervention type and intervention  
34 details in both experimental and control groups (type, modes of application, frequency, intensity and level  
35 of adherence); prevention depression outcomes and validated instruments used; and follow-up. Whenever  
36 possible, we will use results from intention-to-treat analysis.  
37  
38  
39  
40  
41

### 42 **Risk of bias**

43  
44 The quality of the articles will be assessed using the six criteria of risk bias proposed by the Cochrane  
45 Collaboration tool: random sequence generation, allocation concealment, blinding of participants and  
46 personnel, blinding of outcome assessment, incomplete outcome data (e.g. dropouts and withdrawals)  
47 and selective reporting. To manage the risk of bias as a quantitative variable in meta-regression, it will be  
48 assessed by assigning the zero points to low-risk criteria, one to unclear and two to high-risk criteria.  
49 Therefore, the highest risk of bias score will be 12 and the lowest zero. The risk of bias will be assessed  
50 independently by two reviewers. In case of disagreement, a third reviewer will be consulted. The inter-  
51 agreement will be rated using Intraclass Correlation Coefficient [37]. The original study investigators will  
52 be contacted for more information, when necessary.  
53  
54  
55  
56  
57  
58  
59  
60

### Assessment of publication bias

Publication bias will be evaluated by inspecting the funnel plot on the primary outcome measure and by Duval and Tweedie's trim-and-fill procedure [38], which yields an estimate of the effect size after adjusting for publication bias. The funnel plot is expected to be symmetric, equally dispersed on the general effect. If there are missing studies the trim and fill procedure imputes these studies and adds them to the analysis. We will also perform Begg and Mazumdar rank correlation [39] and Egger's test [40]. If asymmetry is potentially caused by publication bias, we expect to see high standard errors (small studies) associated with larger effect sizes.

### Statistical analysis

All statistical analyses will be performed using the Comprehensive Meta-Analysis (CMA) software package, version 2.2.021 and STATA-Release-14.2. Standardized mean difference (SMD) will be used as effect size as most RCTs included in our meta-analysis are expected to report differences in symptoms of depression. For each study, we will first calculate the SMD by merging the SMD at different follow-up times into a single average estimate. We then will calculate the pooled SMD of all RCTs as well as its 95% confidence interval (CI). If some RCT only reports new cases of depression" (incidence of depression) CMA will be used to obtain the equivalent SMD. Negative SMDs (standardized mean differences between intervention and control group) will indicate a better outcome (reduction of depressive symptoms) in the intervention group. Following the interpretation proposed by Cohen for this effect size: -0.2 is small; -0.5 medium and -0.8 large [40]. We will inflate the standard errors of the nested comparisons in the same RCT following the suggestions of Cates [42]. *A priori*, we selected a random-effects model for our meta-analysis under the assumption that the RCTs to be included in our study will be performed in heterogeneous 'populations' that may differ from each other [43].

To test the heterogeneity of effect sizes,  $I^2$  and its 95% confidence interval will be calculated and expressed as percentages, where a value of 0-40% might be unimportant heterogeneity, 30-60% moderate, 50-90% substantial and 75-100% considerable [43]. We will also calculate the Cochran's Q statistic and its P value.

We will perform the following sensitivity analyses: at first and last follow-up, using fixed effects and Hedges'g and excluding some RCTs from analysis (e.g. those which cause the greatest increase in heterogeneity).

We will use a mixed-effects model for sub-group analyses based on a set of variables selected a priori, as follows: type of prevention (universal, selective, or indicated), prevention of depression as primary or secondary outcome, type of outcome measure (symptoms scale versus standardized diagnostic interview), country, population age, setting (school, primary care,...), comparator (waiting list, usual care,

1  
2  
3 active control), intervention orientation (CBT, other), intervention format, intervention guidance (guided or  
4 unguided), number of sessions or impacts, follow-up, level of usability or adherence (if it was measured),  
5 sample size and risk of bias.  
6

7  
8 Random-effect meta-regressions will be performed to investigate whether there are differences in effect  
9 sizes over time or according to the risk of bias. Normality of quantitative variables will be verified by the  
10 Skewnes and Kurtosis normality test prior to inclusion in meta-regression analysis [44]; transformations  
11 will be conducted, when appropriate, to get approximation to normality when necessary. If significant  
12 heterogeneity is observed, the covariables with a  $p < 0.15$  which were not removed from the model due to  
13 collinearity will be also included in meta-regression models. Risk of bias and sample size will be forced  
14 into meta-regression models to adjust for them, the latter only in case of detection of publication bias.  
15 Standard error and confidence intervals will be calculated using the Knapp & Hartung method [45]. P-  
16 values will be calculated using Higgins & Thompson [46] permutation test approach, taking into account  
17 multiplicity adjustment, when necessary. A normal probability plot of standardized shrunken residuals will  
18 be used to estimate the goodness of fit of meta-regression models.  
19  
20  
21  
22  
23

#### 24 **The quality of evidence**

25  
26  
27 The quality of evidence in the domains of risk of bias, consistency, directness, precision and publication  
28 bias will be assessed using the Grading of Recommendations Assessment, Development and Evaluation  
29 working group methodology [47]. Additional domains may be considered, where appropriate.  
30  
31

#### 32 **Ethics and dissemination**

33  
34 The results will be disseminated through peer-reviewed publication and will be presented at a professional  
35 conference. Ethical assessment is not required as we will search and assess existing sources of literature.  
36  
37  
38  
39  
40  
41  
42  
43  
44  
45  
46  
47  
48  
49  
50  
51  
52  
53  
54  
55  
56  
57  
58  
59  
60

### Authors' contributions

AR is the guarantor. EM, PMP and JAB designed the study and the other authors collaborated on the design. AR drafted the protocol and EM and JAB revised the manuscript. AR, DMR, SCC and DSC will independently screen the potential studies, extract data, assess the risk of bias and finish data synthesis. JAB and PMP will perform data analysis. All authors read, provided feedback, discussed and approved the final manuscript.

### Funding

This work is supported by the Spanish Ministry of Health, the Institute of Health Carlos III and the European Regional Development Fund «Una manera de hacer Europa» (grant FIS reference: PI12/02755) and the Andalusian Council of Health (grant reference: 0583/2012); as well as by the Prevention and Health Promotion Research Network 'redIAPP' (RD16/0007).

### Competing interests

The authors all declare they have no competing interests. The funders had no direct role in the design of the study and they will have no input on the interpretation or publication of the study results.

**REFERENCES**

1. Parker G, McCraw S, Hadzi-Pavlovic D, Fletcher K. Costs of the principal mood disorders: A study of comparative direct and indirect costs incurred by those with bipolar I, bipolar II and unipolar disorders. *J Affect Disord.* 2013;149:46–55. doi:10.1016/j.jad.2012.10.002
2. World Health Organization. Depression and Other Common Mental Disorders Global Health Estimates. Geneva; 2017.
3. GBD 2015 DALYs and HALE Collaborators. Global , regional , and national disability-adjusted life-years ( DALYs ) for 315 diseases and injuries and healthy life expectancy ( HALE ), 1990 – 2015: a systematic analysis for the Global Burden of Disease Study 2015. *Lancet.* 2016;388:1603–58.
4. Mathers CD, Loncar D. Projections of global mortality and burden of disease from 2002 to 2030. *PLoS Med.* 2006;3:2011–30.
5. Whiteford HA, Degenhardt L, Rehm J, Baxter AJ, Ferrari AJ, Erskine HE, et al. Global burden of disease attributable to mental and substance use disorders: findings from the Global Burden of Disease Study 2010. *Lancet.* 2013;6736:1–12. doi:10.1016/S0140-6736(13)61611-6
6. Cuijpers P, Cristea IA. What if a placebo effect explained all the activity of depression treatments? *World Psychiatry.* 2015;14:310–1.
7. Linde K, Kriston L, Rücker G, Jamil S, Schumann I, Meissner K, et al. Efficacy and Acceptability of Pharmacological Treatments for Depressive Disorders in Primary Care: Systematic Review and Network Meta-Analysis. *Ann Fam Med.* 2015;13:69–79.
8. Ho SC, Chong HY, Chaiyakunapruk N, Tangiisuran B, Jacob SA. Clinical and economic impact of non-adherence to antidepressants in major depressive disorder: A systematic review. *J Affect Disord.* 2016;193:1–10. doi:10.1016/j.jad.2015.12.029
9. Cuijpers P, Beekman AT, Reynolds C. Preventing depression: a global priority. *JAMA.* 2012;307:1033–4.
10. Chisholm D, Sanderson K, Ayuso JL, Saxena S. Reducing the global burden of depression Population-level analysis of intervention cost-effectiveness in 14 world regions. *Br J Psychiatry.* 2004;184:393–403.
11. Christensen H, Pallister E, Smale S, Hickie IB, Calear AL. Community-based prevention programs for anxiety and depression in youth: A systematic review. *J Prim Prev.* 2010; 31(3):139-70. doi: 10.1007/s10935-010-0214-8.
12. Muñoz RF, Cuijpers P, Smit F, Barrera AZ, Leykin Y. Prevention of major depression. *Annu Rev Clin Psychol.* 2010;6:181-212. doi: 10.1146/annurev-clinpsy-033109-132040.

13. Conejo-Cerón S, Moreno-peral P, Rodríguez-Morejón A, Motrico E, Navas-Campaña D, Rigabert A, et al. Effectiveness of Psychological and Educational Interventions to Prevent Depression in Primary Care: A Systematic Review and Meta-Analysis. *Ann Fam Med*. 2017;15:262–71. doi: 10.1370/afm.2031.
14. Hetrick S, Cox G, Merry S. Where to Go from Here? An Exploratory Meta-Analysis of the Most Promising Approaches to Depression Prevention Programs for Children and Adolescents. *Int J Environ Res. Public Health*. 2015;12:4758–95. doi: 10.3390/ijerph120504758.
15. Merry S, Hetrick S, Cox G, Brudevold-Iversen T, Bir J, McDowell H. Psychological and educational interventions for preventing depression in children and adolescents. *Cochrane Database Syst Rev*. 2011; 7:CD003380. doi: 10.1002/14651858.CD003380.pub3.
16. Van Zoonen K, Buntrock C, Ebert DD, Smit F, Reynolds CF, Beekman ATF, et al. Preventing the onset of major depressive disorder: A meta-analytic review of psychological interventions. *Int J Epidemiol*. 2014;43:318–29. doi: 10.1093/ije/dyt175.
17. Richardson T, Stallard P, Velleman S. Computerised Cognitive Behavioural Therapy for the Prevention and Treatment of Depression and Anxiety in Children and Adolescents: A Systematic Review. *Clin Child Fam Psychol Rev*. 2010;13:275–90. doi: 10.1007/s10567-010-0069-9.
18. Bellón JÁ, Moreno-Peral P, Motrico E, Rodríguez-Morejón A, Fernández A, Serrano-Blanco A, et al. Effectiveness of psychological and/or educational interventions to prevent the onset of episodes of depression: A systematic review of systematic reviews and meta-analyses. *Prev Med*. 2015;76:S22–32. doi: 10.1016/j.ypmed.2014.11.003.
19. Lewis-Fernández R, Rotheram-borus MJ, Betts VT, Greenman L, Essock SM, Escobar JI, et al. Rethinking funding priorities in mental health research. *Br J Psychiatry*. 2016;208:507–9. doi: 10.1192/bjp.bp.115.179895.
20. Gladstone TG, Marko-Holguin M, Rothberg P, Nidetz J, Diehl A, DeFrino DT, et al. An internet-based adolescent depression preventive intervention: study protocol for a randomized control trial. *Trials*. 2015;16:1–17. doi: 10.1186/s13063-015-0705-2.
21. Hoorelbeke K, Faelens L, Behiels J, Koster EHW. Internet-delivered cognitive control training as a preventive intervention for remitted depressed patients: Protocol for a randomized controlled trial. *BMC Psychiatry*. *BMC Psychiatry*; 2015;15:125. doi: 10.1186/s12888-015-0511-0.
22. Saulsberry A, Marko-Holguin M, Blomeke K, Hinkle C, Fogel J, Gladstone T, et al. Randomized clinical trial of a primary care internet-based intervention to prevent adolescent depression: One-year outcomes. *J Can Acad Child Adolesc. Psychiatry*. 2013;22:106–17.
23. Noell J, Glasgow RE. Interactive technology applications for behavioral counseling: Issues and opportunities for health care settings. *Am J Prev Med*. 1999;17:269–74.

- 1  
2  
3 24. Ybarra ML, Eaton WW. Internet-based mental health interventions. *Ment. Health Serv Res.* 2005;7:75–  
4 87.  
5  
6 25. Levy JA, Strombeck R. Health benefits and risks of the internet. *J Med Syst.* 2002;26:495–510.  
7  
8 26. Christensen H, Griffiths K. The prevention of depression using the Internet. *Med J Aust.* 2002;7:S122-  
9 5.  
10  
11 27. Andersson G, Titov N. Advantages and limitations of Internet-based interventions for common mental  
12 disorders. *World Psychiatry.* 2014;13:4–11. doi: 10.1002/wps.20083.  
13  
14 28. Sander L, Rausch L, Baumeister H. Effectiveness of Internet-Based Interventions for the Prevention of  
15 Mental Disorders: A Systematic Review and Meta-Analysis. *JMIR Ment. Heal.* 2016;3:e38. doi:  
16 10.2196/mental.6061.  
17  
18 29. Zhou T, Li X, Pei Y, Gao J, Kong J. Internet-based cognitive behavioural therapy for subthreshold  
19 depression: a systematic review and meta-analysis. *BMC Psychiatry.* 2016;16(1):356.  
20  
21 30. Deady M, Choi I, Calvo RA, Glozier N, Christensen H, Harvey SB. eHealth interventions for the  
22 prevention of depression and anxiety in the general population: a systematic review and meta-analysis.  
23 *BMC Psychiatry.* 2017;17:310. doi:10.1186/s12888-017-1473-1.  
24  
25 31. Buntrock C, Ebert DD, Lehr D, Smit F, Riper H, Berking M, et al. Effect of a Web-Based Guided Self-  
26 help Intervention for Prevention of Major Depression in Adults With Subthreshold Depression: A  
27 Randomized Clinical Trial. *JAMA.* United States; 2016;315:1854–63. doi: 10.1001/jama.2016.4326.  
28  
29 32. Imamura K, Kawakami N, Furukawa TA, Matsuyama Y, Shimazu A, Umanodan R, et al. Does Internet-  
30 based cognitive behavioral therapy (iCBT) prevent major depressive episode for workers? A 12-month  
31 follow-up of a randomized controlled trial. *Psychol Med.* 2015;45:1907–17. doi:  
32 10.1017/S0033291714003006.  
33  
34 33. Lintvedt OK, Griffiths KM, Sørensen K, Østvik AR, Wang CE a, Eisemann M, et al. Evaluating the  
35 effectiveness and efficacy of unguided internet-based self-help intervention for the prevention of  
36 depression: a randomized controlled trial. *Clin Psychol Psychother.* 2013;20:10–27. doi: 10.1002/cpp.770.  
37  
38 34. Morgan AJ, Jorm AF, Mackinnon AJ. Email-based promotion of self-help for subthreshold depression:  
39 Mood Memos randomised controlled trial. *Br J Psychiatry.* 2012;200:412–8. doi:  
40 10.1192/bjp.bp.111.101394.  
41  
42 35. Spek V, Nyklíček I, Smits N, Cuijpers P, Riper H, Keyzer J, et al. Internet-based cognitive behavioural  
43 therapy for subthreshold depression in people over 50 years old. *Psychol Med.* 2007 Dec;37:1797-806.  
44  
45 36. Moher D, Liberati A, Tetzlaff J, Altman DG. Reprint--preferred reporting items for systematic reviews  
46 and meta-analyses: the PRISMA statement. *Phys Ther.* 2009;89:873–80.  
47  
48  
49  
50  
51  
52  
53  
54  
55  
56  
57  
58  
59  
60

- 1  
2  
3 37. Fleiss JL. *Statistical Methods for Rates and Proportions*. 2nd Ed. Wiley, editor. New York; 1981.
- 4  
5 38. Duval S, Tweedie R. Trim and Fill: A Simple Funnel-Plot-Based Method. *Biometrics*. 2000;56:455–63.
- 6  
7 39. Begg CB, Mazumdar M. Operating Characteristics of a Rank Correlation Test for Publication Bias.  
8 *Biometrics*. 1994;50:1088.
- 9  
10 40. Stuck AE, Rubenstein LZ, Wieland D, Vandembroucke JP, Irwig L, Macaskill P, et al. Bias in meta-  
11 analysis detected by a simple, graphical. *Bmj*. 1998;316:469–469.
- 12  
13 41. Jacob Cohen. *Statistical Power Analysis for the Behavioral Sciences*. L. Erlbaum Associates, editor.  
14 1988.
- 15  
16 42. Cates C. Multiple-arm trial data: using a corrected standard error for GIV analyses. *Filter. Inf. overload*  
17 better Decis. Abstr. 23rd Cochrane Colloquium; Vienna, Austria: John Wiley & Sons; 2015.
- 18  
19 43. Higgins J, Green S, editors. *Cochrane Handbook for Systematic Reviews of Interventions Version*  
20 5.1.0 [updated March 2011]. The Cochrane Collaboration; 2011.
- 21  
22 44. D'Agostino RB, Belanger AJ, D'Agostino RB Jr. A suggestion for using powerful and informative tests  
23 of normality. *American Statistician*. 1990;44:316-321.
- 24  
25 45. Knapp G, Hartung J. Improved tests for a random effects meta-regression with a single covariate. *Stat.*  
26 *Med*. 2003;22:2693–710.
- 27  
28 46. Higgins JPT, Thompson SG. Controlling the risk of spurious findings from meta-regression. *Stat. Med.*  
29 2004;23:1663–82.
- 30  
31 47. Balshem H, Helfand M, Schünemann HJ, Oxman AD, Kunz R, Brozek J, et al. GRADE guidelines: 3.  
32 Rating the quality of evidence. *J Clin Epidemiol*. 2011;64:401–6. doi: 10.1016/j.jclinepi.2010.07.015.
- 33  
34  
35  
36  
37  
38  
39  
40  
41  
42  
43  
44  
45  
46  
47  
48  
49  
50  
51  
52  
53  
54  
55  
56  
57  
58  
59  
60



Supplementary file 1. Search Strategy.

The keywords and index terms we used in PubMed database were the following: ("depressive disorder"[MeSH Terms] OR "depressive disorder" OR depress\* OR "depression"[MeSH Terms] OR "anxiety"[MeSH Terms] OR "anxiety"[All Fields]) AND prevent\* AND ("internet"[MeSH Terms] OR "internet"[All Fields] OR web-based OR technology intervention OR "telemedicine"[MeSH Terms] OR "telemedicine"[All Fields] OR "ehealth"[All Fields] OR online OR "social networking"[MeSH Terms] OR ("social"[All Fields] AND "networking"[All Fields]) OR "social networking"[All Fields] OR computer\* OR interactive OR "software"[MeSH Terms] OR "software"[All Fields]) AND (randomized controlled trial[Publication Type] OR trial[Title/Abstract]). Searches were piloted in PubMed then adapted to run across PsycINFO, WOS and Scopus. The search strategy was performed by two independent researchers (AR and DMR).

## PRISMA-P checklist

| Section and topic                  | Item No | Checklist item                                                                                                                                                                                                                                   | Page |
|------------------------------------|---------|--------------------------------------------------------------------------------------------------------------------------------------------------------------------------------------------------------------------------------------------------|------|
| <b>Administrative information</b>  |         |                                                                                                                                                                                                                                                  |      |
| Title:                             |         |                                                                                                                                                                                                                                                  |      |
| Identification                     | 1a      | Identify the report as a protocol of a systematic review                                                                                                                                                                                         | 1    |
| Update                             | 1b      | If the protocol is for an update of a previous systematic review, identify as such                                                                                                                                                               | -    |
| Registration                       | 2       | If registered, provide the name of the registry (such as PROSPERO) and registration number                                                                                                                                                       | 2,5  |
| Authors:                           |         |                                                                                                                                                                                                                                                  |      |
| Contact                            | 3a      | Provide name, institutional affiliation, e-mail address of all protocol authors; provide physical mailing address of corresponding author                                                                                                        | 1    |
| Contributions                      | 3b      | Describe contributions of protocol authors and identify the guarantor of the review                                                                                                                                                              | 10   |
| Amendments                         | 4       | If the protocol represents an amendment of a previously completed or published protocol, identify as such and list changes; otherwise, state plan for documenting important protocol amendments                                                  | -    |
| Support:                           |         |                                                                                                                                                                                                                                                  |      |
| Sources                            | 5a      | Indicate sources of financial or other support for the review                                                                                                                                                                                    | 10   |
| Sponsor                            | 5b      | Provide name for the review funder and/or sponsor                                                                                                                                                                                                | 10   |
| Role of sponsor or funder          | 5c      | Describe roles of funder(s), sponsor(s), and/or institution(s), if any, in developing the protocol                                                                                                                                               | 10   |
| <b>Introduction</b>                |         |                                                                                                                                                                                                                                                  |      |
| Rationale                          | 6       | Describe the rationale for the review in the context of what is already known                                                                                                                                                                    | 4,5  |
| Objectives                         | 7       | Provide an explicit statement of the question(s) the review will address with reference to participants, interventions, comparators, and outcomes (PICO)                                                                                         | 5    |
| <b>Methods</b>                     |         |                                                                                                                                                                                                                                                  |      |
| Eligibility criteria               | 8       | Specify the study characteristics (such as PICO, study design, setting, time frame) and report characteristics (such as years considered, language, publication status) to be used as criteria for eligibility for the review                    | 5    |
| Information sources                | 9       | Describe all intended information sources (such as electronic databases, contact with study authors, trial registers or other grey literature sources) with planned dates of coverage                                                            | 6,7  |
| Search strategy                    | 10      | Present draft of search strategy to be used for at least one electronic database, including planned limits, such that it could be repeated                                                                                                       | 6,7  |
| Study records:                     |         |                                                                                                                                                                                                                                                  |      |
| Data management                    | 11a     | Describe the mechanism(s) that will be used to manage records and data throughout the review                                                                                                                                                     | 7    |
| Selection process                  | 11b     | State the process that will be used for selecting studies (such as two independent reviewers) through each phase of the review (that is, screening, eligibility and inclusion in meta-analysis)                                                  | 7    |
| Data collection process            | 11c     | Describe planned method of extracting data from reports (such as piloting forms, done independently, in duplicate), any processes for obtaining and confirming data from investigators                                                           | 7    |
| Data items                         | 12      | List and define all variables for which data will be sought (such as PICO items, funding sources), any pre-planned data assumptions and simplifications                                                                                          | 7    |
| Outcomes and prioritization        | 13      | List and define all outcomes for which data will be sought, including prioritization of main and additional outcomes, with rationale                                                                                                             | 7,8  |
| Risk of bias in individual studies | 14      | Describe anticipated methods for assessing risk of bias of individual studies, including whether this will be done at the outcome or study level, or both; state how this information will be used in data synthesis                             | 7,8  |
| Data synthesis                     | 15a     | Describe criteria under which study data will be quantitatively synthesized                                                                                                                                                                      | 8,9  |
|                                    | 15b     | If data are appropriate for quantitative synthesis, describe planned summary measures, methods of handling data and methods of combining data from studies, including any planned exploration of consistency (such as $I^2$ , Kendall's $\tau$ ) | 8,9  |
|                                    | 15c     | Describe any proposed additional analyses (such as sensitivity or subgroup analyses, meta-regression)                                                                                                                                            | 8,9  |
|                                    | 15d     | If quantitative synthesis is not appropriate, describe the type of summary planned                                                                                                                                                               | -    |
| Meta-bias(es)                      | 16      | Specify any planned assessment of meta-bias(es) (such as publication bias across studies, selective reporting within studies)                                                                                                                    | 8    |
| Confidence in cumulative evidence  | 17      | Describe how the strength of the body of evidence will be assessed (such as GRADE)                                                                                                                                                               | 9    |

# BMJ Open

## Effectiveness of online interventions in preventing depression: A protocol for systematic review and meta-analysis of randomized controlled trials.

|                                 |                                                                                                                                                                                                                                                                                                                                                                                                                                                                                                                                                                                                                                                                                                                                                                                                                                                                     |
|---------------------------------|---------------------------------------------------------------------------------------------------------------------------------------------------------------------------------------------------------------------------------------------------------------------------------------------------------------------------------------------------------------------------------------------------------------------------------------------------------------------------------------------------------------------------------------------------------------------------------------------------------------------------------------------------------------------------------------------------------------------------------------------------------------------------------------------------------------------------------------------------------------------|
| Journal:                        | <i>BMJ Open</i>                                                                                                                                                                                                                                                                                                                                                                                                                                                                                                                                                                                                                                                                                                                                                                                                                                                     |
| Manuscript ID                   | bmjopen-2018-022012.R1                                                                                                                                                                                                                                                                                                                                                                                                                                                                                                                                                                                                                                                                                                                                                                                                                                              |
| Article Type:                   | Protocol                                                                                                                                                                                                                                                                                                                                                                                                                                                                                                                                                                                                                                                                                                                                                                                                                                                            |
| Date Submitted by the Author:   | 04-Jul-2018                                                                                                                                                                                                                                                                                                                                                                                                                                                                                                                                                                                                                                                                                                                                                                                                                                                         |
| Complete List of Authors:       | Rigabert, Alina; Universidad Loyola Andalucia, Psychology; Universidad Loyola<br>Motrico, Emma; Universidad Loyola Andalucia, Psychology<br>Moreno-Peral, Patricia; Prevention and Health Promotion Research Network (redIAPP), ISCIII,; Research Unit of the Health District of Primary Care Málaga-Guadalhorce<br>Resurrección, Davinia M.; Universidad Loyola Andalucia, Psychology<br>Conejo-Cerón, Sonia; Prevention and Health Promotion Research Network (redIAPP), ISCIII,; Research Unit of the Health District of Primary Care Málaga-Guadalhorce<br>Navas-Campaña, Desirée; Prevention and Health Promotion Research Network (redIAPP), ISCIII,; Research Unit of the Health District of Primary Care Málaga-Guadalhorce<br>Bellón, Juan A.; Health District of Primary Care Málaga-Guadalhorce, SAS, ; Biomedical Research Institute of Malaga (IBIMA), |
| <b>Primary Subject Heading</b>: | Mental health                                                                                                                                                                                                                                                                                                                                                                                                                                                                                                                                                                                                                                                                                                                                                                                                                                                       |
| Secondary Subject Heading:      | Public health, Global health                                                                                                                                                                                                                                                                                                                                                                                                                                                                                                                                                                                                                                                                                                                                                                                                                                        |
| Keywords:                       | Depression & mood disorders < PSYCHIATRY, Prevention, Online, randomized controlled trial, Systematic review, Meta-analysis                                                                                                                                                                                                                                                                                                                                                                                                                                                                                                                                                                                                                                                                                                                                         |
|                                 |                                                                                                                                                                                                                                                                                                                                                                                                                                                                                                                                                                                                                                                                                                                                                                                                                                                                     |

SCHOLARONE™  
Manuscripts

1  
2  
3 **Title: Effectiveness of online interventions in preventing depression: A protocol for systematic**  
4 **review and meta-analysis of randomized controlled trials.**  
5

6  
7  
8 **Authors: Alina Rigabert<sup>1</sup>, Emma Motrico <sup>1,2</sup>, Patricia Moreno-Peral<sup>2,3,4</sup>, Davinia M. Resurrección<sup>1</sup>, Sonia**  
9 **Conejo-Cerón<sup>2,3,4</sup>, Desirée Navas-Campaña<sup>2,3,4</sup>, and Juan Á. Bellón<sup>2,3,4,5,6</sup>**  
10

11  
12 <sup>1</sup> Departamento de Psicología, Universidad Loyola Andalucía, Spain.  
13

14  
15 <sup>2</sup> Prevention and Health Promotion Research Network (redIAPP), ISCIII, Spain.  
16

17  
18 <sup>3</sup> Research Unit of the Health District of Primary Care Málaga-Guadalhorce, Spain.  
19

20  
21 <sup>4</sup> Biomedical Research Institute of Malaga (IBIMA), Spain.  
22

23  
24 <sup>5</sup> El Palo Health Centre, Andalusian Health Service (SAS), Málaga, Spain.  
25

26  
27 <sup>6</sup> Department of Public Health and Psychiatry, University of Málaga (UMA), Spain.  
28

29  
30 **Correspondence to:**

31  
32 Dr. Emma Motrico

33  
34 Departamento de Psicología  
35 Universidad Loyola Andalucía  
36 41014 Sevilla, Spain  
37 [emotrico@uloyola.es](mailto:emotrico@uloyola.es)  
38  
39  
40  
41  
42  
43  
44  
45  
46  
47  
48  
49  
50  
51  
52  
53  
54  
55  
56  
57  
58  
59  
60

1  
2  
3 ABSTRACT

4 **Introduction:** Although evidence exists for the efficacy of psychosocial interventions in preventing  
5 depression, little is known about its prevention through online interventions. The objective of this study will  
6 be to conduct a systematic review and meta-analysis of randomized controlled trials assessing the  
7 effectiveness of online interventions in preventing depression in heterogeneous populations.  
8  
9

10 **Methods and analysis:** We will conduct a systematic review and meta-analysis of randomized controlled  
11 trials that will be identified through searches of PubMed, PsycINFO, WOS, Scopus, OpenGrey, Cochrane  
12 Central Register of Controlled Trials (CENTRAL), ClinicalTrials.gov and Australia New Zealand Clinical  
13 Trials Register (ANZCTR). We will also search the reference lists provided in relevant studies and reviews.  
14 Experts in the field will be contacted to obtain more references. Two independent reviewers will assess the  
15 eligibility criteria of all articles, extract data and determine their risk of bias (Cochrane Collaboration Tool).  
16 Baseline depression will be required to have been discarded through standardized interviews or validated  
17 self-reports with standard cut-off points. The outcomes will be the incidence of new cases of depression  
18 or/and the reduction of depressive symptoms as measured by validated instruments. Pooled standardized  
19 mean differences will be calculated using random-effect models. Heterogeneity and publication bias will be  
20 estimated. Predefined sensitivity and subgroup analyses will be performed. If heterogeneity is relevant,  
21 random-effect meta-regression will be performed.  
22  
23  
24  
25  
26  
27

28 **Ethics and dissemination:** The results will be disseminated through peer-reviewed publication and will  
29 be presented at a professional conference. Ethical assessment is not required as we will search and  
30 assess existing sources of literature.  
31  
32

33 **PROSPERO Registration number:** CRD42014014804.  
34  
35  
36  
37  
38  
39  
40  
41  
42  
43  
44  
45  
46  
47  
48  
49  
50  
51  
52  
53  
54  
55  
56  
57  
58  
59  
60

**Strengths and limitations of this study**

- This is the first systematic review and meta-analysis of randomized controlled trials assessing the effectiveness of online interventions in preventing depression in a heterogeneous population.
- The study will be conducted according to PRISMA-guidelines for reporting systematic reviews and meta-analysis to meet the highest scientific quality.
- The effect size, robustness and quality of evidence found in this meta-analysis will help determine whether depression can be prevented through online interventions.
- This study will have the limitations inherent to any systematic review and meta-analysis, such as the loss of information on outcome variables, or the assumption that the evaluation techniques are consistent across studies.
- The number and quality of the RCTs included, heterogeneity, and occurrence of publication bias might limit the interpretation of results.

## INTRODUCTION

Depression is a common, resource-consuming and disabling mental disorder that reduces life expectancy [1]. There are currently 322 million people with depression in the world [2]. The average lifetime and 12-month prevalence estimates of DSM-IV Major Depression Episode in high-income countries are 14.6% and 5.5%, respectively [3]. In the last ten years, the burden of major depression measured as years lived with disability (YLD) increased by 17.8%, ranking third in the world in disease burden [3] and will rank first in high-income countries by 2030 [4]. In addition, depression is the primary cause of disability in the world attributable to mental and substance use disorders [5].

Current treatments for depression show several constraints such as accessibility issues, limited efficacy, or lack of adherence [6–8]. Even if it was possible to provide appropriate treatments to all persons affected by a depressive disorder, the effect on averting YLD would be limited because of the steady influx of new cases of depression [9]. For all these reasons the burden of depression can only be reduced by 20-30% [10]. Prevention may offer new possibilities to reduce the disease burden of depressive disorders [11,12].

Hundreds of randomized controlled trials (RCTs) and dozens of systematic reviews / meta-analysis (SR/MA) have been published on interventions to prevent depression [13–17]. A systematic review of SR/MA of psychological and/or educational interventions to prevent depression included 12 SR/MA (156 non-repeated trials and 56,158 participants) and found a small-moderate preventive effect [18]. If preventive interventions reach a significant part of the population, even if this effect size is small, the impact on health, quality of life and healthcare costs could be relevant. From this point of view, scalability is crucial to prevention interventions. Solutions may leverage technological advances, such as mHealth-based counselling, computer and web-based resources [19].

Interest in online prevention programs for depression has increased substantially in recent years [20–22]. Online interventions offer some advantages over face-to-face interventions for both, patients and the health system. Its advantages include greater intimacy, lower economical costs, the opportunity of joining the intervention at any time and place, easy access to a wider range of people (disabled population, rural areas, etc.) and a reduction in the time of waiting, among others [23–27].

So far, three SR/MA on the effectiveness of online interventions in preventing mental disorders have been published [28–30]. To our knowledge, these previous reviews have some limitations. One [28] was focused on several mental disorders altogether (Eating, Anxiety, Insomnia, Post-Traumatic Stress, Depression and Common Mental Health Disorders) and included only four trials on the prevention of depression. A limitation was the inclusion of some studies that only reported mean scores and did not clearly state that participants did not exceed clinical cut-offs at baseline, thus making it difficult to separate treatment from prevention. The other [29] was focused on the online cognitive behavioural therapy for subthreshold depression, which restricts its inference for that kind of psychotherapy and only for a type of prevention, indicated prevention; not addressed, thus, universal and selective prevention strategies. In addition new RCTs on online interventions for the prevention of depression have been published [31–35]. The last SR/MA [30] found a small preventive effect of the eHealth interventions to prevent anxiety and

1  
2  
3 depression; however, there were some exclusion criteria which limited their inferences: age (18-64 years),  
4 language (English), date (from 2000) and non-specific population (e.g. post-natal or comorbid). Therefore,  
5 the objective of this study will be to conduct a systematic review and meta-analysis of randomized  
6 controlled trials assessing the effectiveness of online interventions in preventing depression in  
7 heterogeneous populations.  
8  
9

## 10 11 12 **METHODS AND ANALYSIS**

13  
14 We followed PRISMA-P guidelines for reporting systematic reviews and meta-analysis protocols [36]. The  
15 protocol of this study has already been registered with the International Prospective Register of  
16 Systematic Reviews, (PROSPERO) on 20 November 2014 and was last updated on 23 November 2017  
17 (registration number: CRD42014014804).  
18  
19

### 20 21 **Eligibility criteria**

22 The rationale for the inclusion and exclusion criteria outlined below is to obtain a comprehensive overview  
23 of the RCTs performed so far assessing the effectiveness of online interventions in preventing depression  
24 in different populations and settings.  
25  
26

### 27 28 **Study design**

29 We will focus on randomized controlled trials (RCT) since this design provides more evidence on causality  
30 and is considered a gold-standard for clinical trials [37]. Cluster randomized trials will only be included if  
31 there are at least two intervention and control sites and outcomes are reported adjusted for clustering  
32 effect. Controlled non-randomized clinical trials or before-after trials will be excluded.  
33  
34  
35

### 36 37 **Participants and exclusion of depression at baseline**

38 Participants may have any sociodemographic (age, sex, etc.) or clinical (healthy, chronic physical illness,  
39 etc.) characteristic and all settings (community, schools, primary care, etc.) will be considered. To make a  
40 clear distinction between the effectiveness of prevention interventions from that of treatments, baseline  
41 depression will be required to have been discarded through standardized interviews (eg. CIDI) or validated  
42 self-reports with standard cut-off points (eg. BDI-II). In a preventive context, the most useful parameter of  
43 validity of a diagnostic instrument to discard depression at baseline is the "negative predictive value"  
44 (NPV): probability of having a depressive disorder when the result of a diagnostic tool is negative. The  
45 NPV is influenced by three main parameters: cut-off selected, sensitivity associated with that cut-off and  
46 prevalence of anxiety disorders in the reference population of the study. Higher sensitivity, lower cut-off  
47 and prevalence will increase the NPV and minimize false negatives. Structured standardized interviews  
48 generally have greater validity than symptom scales and, therefore, the former are preferable. However,  
49 structured standardized interviews tend to have greater specificity than sensitivity; therefore, false  
50 positives will be minimized at the expense of increasing false negatives. From this point of view, a  
51  
52  
53  
54  
55  
56  
57  
58  
59  
60



1  
2  
3 symptoms scale with a diagnostic threshold associated with high sensitivity could guarantee as valid as a  
4 structured standardized interview, especially if the study is carried out on a reference population with a low  
5 prevalence of depressive disorders, as it is usual in prevention studies.  
6  
7

### 8 **Type of interventions**

9  
10 We will only include RCTs assessing the effectiveness of psychosocial and/or educational, since they  
11 share the same mechanism of action that facilitates changes in attitudes and behaviours and because  
12 most interventions to prevent depression are of this type. Educational interventions provide information  
13 sessions or fact sheets, whereas psychosocial interventions attempt to change how people think and  
14 behave by using a variety of strategies (e.g. cognitive-behavioral or interpersonal). However, in real  
15 practice psychosocial and educational interventions can overlap, being difficult to distinguish them.  
16 Interventions must be accessible online and the study should include at least an internet-delivered  
17 intervention program. If no on-line intervention is implemented in any of the experimental arms, the RCT  
18 will be excluded. Intervention arms where active pharmacological therapies are administered will also be  
19 excluded.  
20  
21  
22  
23  
24  
25

### 26 **Comparators**

27  
28 Comparator groups could be "only assessments", "no treatment", "usual care", "waiting list", or any type of  
29 active control which has no effect on depression. All types of placebo (psychological or pill) will also be  
30 accepted as comparators. Comparator arms which intervention (psychological, physical or  
31 pharmacological) has been proven to be effective in preventing depression will also be excluded.  
32  
33

### 34 **Outcomes**

35  
36 RCTs which primary or secondary outcomes were the incidence of new cases of depression and/or the  
37 reduction of depression symptoms will be included. Outcomes will be required to have been measured by  
38 standardized interviews or validated symptom scales. When more than a symptom scale has been used to  
39 measure outcomes in a RCT, the data from the highest validity scale will be employed. If the validation  
40 data of the scales, in the country and setting where the study was conducted, are not reported in the  
41 article, they will be searched in the literature and other sources. The parameters that will be used to select  
42 the scale of symptoms are: higher Youden's J statistic ( $J = \text{Sensitivity} + \text{Specificity} - 1$ ), Cronbach alpha, and  
43 Intraclass Correlation Coefficient (test-retest), and sensitivity to change over time (Yes/no/not available).  
44 For each trial, the scale of symptoms that provide more validation data and of higher quality will be  
45 chosen. If depression outcomes are measured together with other outcomes (e.g. anxiety) and data are  
46 not provided separately, RCTs will be excluded.  
47  
48  
49  
50  
51  
52  
53

### 54 **Information sources and search strategy**

1  
2  
3 A literature search of the following electronic databases will be carried out: PubMed, PsycINFO, WOS,  
4 Scopus and Cochrane Central Register of Controlled Trials (CENTRAL). Search will be supplemented by  
5 searching for trial protocols on ClinicalTrials.gov and Australia New Zealand Clinical Trials Register  
6 (ANZCTR). We will also examine OpenGrey (System for Information on Grey Literature in Europe), where  
7 grey literature is indexed. PROSPERO will be searched for ongoing or recently completed systematic  
8 reviews. To ensure literature saturation we will also review reference lists from relevant systematic reviews  
9 and meta-analysis and those from the RCTs included in our SR/MA. In addition, expert authors will be  
10 contacted in order to identify missing articles in our search. Literature search strategies will be developed  
11 using medical subject headings (MeSH) and text words related to prevention, depression and internet  
12 intervention. No limits will be imposed on study publication language or publication date. The search will  
13 be updated toward the end of the review. A draft MEDLINE search strategy in PICOS format is included in  
14 supplementary file. We will adapt the MEDLINE strategy to the syntax and subject headings of the other  
15 databases.  
16  
17  
18  
19  
20  
21

### 22 **Study selection**

23  
24 The entire selection process will be conducted independently by two reviewers. After elimination of  
25 duplicate studies, all records will be reviewed. Based on their titles and abstracts, the studies that do not  
26 meet inclusion criteria will be ruled out. The full text of the studies selected as potentially relevant will be  
27 reviewed for further assessment. Any disagreements will be discussed and resolved by consensus or by a  
28 third independent reviewer, if necessary. We will seek additional information from corresponding authors  
29 when necessary to resolve questions about eligibility. We will record the reasons for excluding trials. The  
30 reviewers will not be blind to the journal titles or the study authors or institutions. Inter-agreement of the  
31 total selection will be assessed using Kappa [38], which can be interpreted as follows: < 0.20 as poor, 0.21  
32 - 0.40 as fair, 0.41 - 0.60 as moderate, as 0.61 - 0.80 as good and 0.81 - 1.00 as excellent.  
33  
34  
35  
36  
37  
38

### 39 **Data extraction**

40  
41 Data extraction from each eligible study will be conducted independently by two reviewers. Any  
42 disagreement will be discussed and resolved by consensus or by a third independent reviewer. We will  
43 also contact authors to get incomplete or unclear information, where appropriate. Abstracted data will  
44 include author/year and country; setting, target population characteristics (age, sex, etc.) and type of  
45 prevention (universal, selective or indicate); sample size (control/intervention); exclusion of depression  
46 criteria at baseline and validated instruments used; orientation and intervention type and intervention  
47 details in both experimental and control groups (type, modes of application, frequency, intensity and level  
48 of adherence); prevention depression outcomes and validated instruments used; and all follow-up  
49 provided from the RCTs. Whenever possible, we will use results from intention-to-treat analysis.  
50  
51  
52  
53

### 54 **Risk of bias**

1  
2  
3 The quality of the articles will be assessed using the six criteria of risk bias proposed by the Cochrane  
4 Collaboration tool: random sequence generation, allocation concealment, blinding of participants and  
5 personnel, blinding of outcome assessment, incomplete outcome data (e.g. dropouts and withdrawals)  
6 and selective reporting. To manage the risk of bias as a quantitative variable in meta-regression, it will be  
7 assessed by assigning the zero points to low-risk criteria, one to unclear and two to high-risk criteria.  
8 Therefore, the highest risk of bias score will be 12 and the lowest zero. The risk of bias will be assessed  
9 independently by two reviewers. In case of disagreement, a third reviewer will be consulted. The inter-  
10 agreement will be rated using Intraclass Correlation Coefficient [38]. The original study investigators will  
11 be contacted for more information, when necessary.  
12  
13  
14  
15

### 16 **Assessment of publication bias**

17  
18 Publication bias will be evaluated by inspecting the funnel plot on the primary outcome measure and by  
19 Duval and Tweedie's trim-and-fill procedure [39], which yields an estimate of the effect size after adjusting  
20 for publication bias. The funnel plot is expected to be symmetric, equally dispersed on the general effect. If  
21 there are missing studies the trim and fill procedure imputes these studies and adds them to the analysis.  
22 We will also perform Begg and Mazumdar rank correlation [40] and Egger's test [41]. If asymmetry is  
23 potentially caused by publication bias, we expect to see high standard errors (small studies) associated  
24 with larger effect sizes.  
25  
26  
27  
28

### 29 **Patient and public involvement**

30  
31 No patients or public were involved in the study.  
32  
33

### 34 **Statistical analysis**

35  
36 All statistical analyses will be performed using the Comprehensive Meta-Analysis (CMA) software  
37 package, version 2.2.021 and STATA-Release-14.2. Standardized mean difference (SMD) will be used as  
38 effect size as most RCTs included in our meta-analysis are expected to report differences in symptoms of  
39 depression. For each study, we will first calculate the SMD by merging the SMD at different follow-up  
40 times into a single average estimate. We then will calculate the pooled SMD of all RCTs as well as its 95%  
41 confidence interval (CI). If some RCT only reports new cases of depression" (incidence of depression)  
42 CMA will be used to obtain the equivalent SMD. Negative SMDs (standardized mean differences between  
43 intervention and control group) will indicate a better outcome (reduction of depressive symptoms) in the  
44 intervention group. Following the interpretation proposed by Cohen for this effect size: -0.2 is small; -0.5  
45 medium and -0.8 large [42]. We will inflate the standard errors of the nested comparisons in the same RCT  
46 following the suggestions of Cates [43]. *A priori*, we selected a random-effects model for our meta-  
47 analysis under the assumption that the RCTs to be included in our study will be performed in  
48 heterogeneous 'populations' that may differ from each other [44].  
49  
50  
51  
52  
53  
54  
55  
56  
57  
58  
59  
60

To test the heterogeneity of effect sizes,  $I^2$  and its 95% confidence interval will be calculated and expressed as percentages, where a value of 0-40% might be unimportant heterogeneity, 30-60% moderate, 50-90% substantial and 75-100% considerable [44]. We will also calculate the Cochran's Q statistic and its P value.

We will perform the following sensitivity analyses: at first and last follow-up, using fixed effects and Hedges'g and excluding some RCTs from analysis (e.g. those which cause the greatest increase in heterogeneity).

We will use a mixed-effects model for sub-group analyses based on a set of variables selected a priori, as follows: type of prevention (universal, selective, or indicated), prevention of depression as primary or secondary outcome, type of outcome measure (symptoms scale versus standardized diagnostic interview), country, population age, setting (school, primary care,...), comparator (waiting list, usual care, active control), intervention orientation (CBT, other), intervention format, intervention guidance (guided or unguided), number of sessions or impacts, follow-up, level of usability or adherence (if it was measured), sample size and risk of bias.

Random-effect meta-regressions will be performed to investigate whether there are differences in effect sizes over time or according to the risk of bias. Normality of quantitative variables will be verified by the Skewness and Kurtosis normality test prior to inclusion in meta-regression analysis [45]; transformations will be conducted, when appropriate, to get approximation to normality. If significant heterogeneity is observed, the covariables with a  $p < 0.15$  which were not removed from the model due to collinearity will be also included in meta-regression models. Risk of bias and sample size will be forced into meta-regression models to adjust for them, the latter only in case of detection of publication bias. Standard error and confidence intervals will be calculated using the Knapp & Hartung method [46]. P-values will be calculated using Higgins & Thompson [47] permutation test approach, taking into account multiplicity adjustment, when necessary. A normal probability plot of standardized shrunken residuals will be used to estimate the goodness of fit of meta-regression models.

### **The quality of evidence**

The quality of evidence in the domains of risk of bias, consistency, directness, precision and publication bias will be assessed using the Grading of Recommendations Assessment, Development and Evaluation working group methodology [48]. Additional domains may be considered, where appropriate.

### **Ethics and dissemination**

The results will be disseminated through peer-reviewed publication and will be presented at a professional conference. Ethical assessment is not required as we will search and assess existing sources of literature.

### **Authors' contributions**

1  
2  
3 AR is the guarantor. EM, PMP and JAB designed the study and the other authors collaborated on the  
4 design. AR drafted the protocol and EM and JAB revised the manuscript. AR, DMR, SCC and DSC will  
5 independently screen the potential studies, extract data, assess the risk of bias and finish data synthesis.  
6 JAB and PMP will perform data analysis. All authors read, provided feedback, discussed and approved the  
7 final manuscript.

### 8 9 **Funding**

10 This work is supported by the Spanish Ministry of Health, the Institute of Health Carlos III and the  
11 European Regional Development Fund «Una manera de hacer Europa» (grant FIS reference: PI12/02755)  
12 and the Andalusian Council of Health (grant reference: 0583/2012); as well as by the Prevention and  
13 Health Promotion Research Network 'redIAPP' (RD16/0007).  
14

### 15 **Competing interests**

16  
17 The authors all declare they have no competing interests. The funders had no direct role in the design of  
18 the study and they will have no input on the interpretation or publication of the study results.  
19  
20  
21  
22  
23  
24  
25  
26  
27  
28  
29  
30  
31  
32  
33  
34  
35  
36  
37  
38  
39  
40  
41  
42  
43  
44  
45  
46  
47  
48  
49  
50  
51  
52  
53  
54  
55  
56  
57  
58  
59  
60

**REFERENCES**

1. Parker G, McCraw S, Hadzi-Pavlovic D, Fletcher K. Costs of the principal mood disorders: A study of comparative direct and indirect costs incurred by those with bipolar I, bipolar II and unipolar disorders. *J Affect Disord* [Internet]. Elsevier; 2013;149:46–55. Available from: <http://dx.doi.org/10.1016/j.jad.2012.10.002>
2. World Health Organization. *Depression and Other Common Mental Disorders Global Health Estimates*. Geneva; 2017.
3. GBD 2015 DALYs and HALE Collaborators. Global , regional , and national disability-adjusted life-years ( DALYs ) for 315 diseases and injuries and healthy life expectancy ( HALE ), 1990 – 2015: a systematic analysis for the Global Burden of Disease Study 2015. *Lancet*. 2016;388:1603–58.
4. Mathers CD, Loncar D. Projections of global mortality and burden of disease from 2002 to 2030. *PLoS Med*. 2006;3:2011–30.
5. Whiteford HA, Degenhardt L, Rehm J, Baxter AJ, Ferrari AJ, Erskine HE, et al. Global burden of disease attributable to mental and substance use disorders: findings from the Global Burden of Disease Study 2010. *Lancet* [Internet]. Elsevier Ltd; 2013;6736:1–12. Available from: [http://dx.doi.org/10.1016/S0140-6736\(13\)61611-6](http://dx.doi.org/10.1016/S0140-6736(13)61611-6)
6. Cuijpers P, Cristea IA. What if a placebo effect explained all the activity of depression treatments? *World Psychiatry*. 2015;14:310–1.
7. Linde K, Kriston L, Rucker G, Jamil S, Schumann I, Meissner K, et al. Efficacy and Acceptability of Pharmacological Treatments for Depressive Disorders in Primary Care: Systematic Review and Network Meta-Analysis. *Ann Fam Med*. 2015;13:69–79.
8. Ho SC, Chong HY, Chaiyakunapruk N, Tangiisuran B, Jacob SA. Clinical and economic impact of non-adherence to antidepressants in major depressive disorder: A systematic review. *J Affect Disord* [Internet]. Elsevier; 2016;193:1–10. Available from: <http://dx.doi.org/10.1016/j.jad.2015.12.029>
9. Cuijpers P, Beekman AT, Reynolds C. Preventing depression: a global priority. *JAMA*. 2012;307:1033–4.
10. Chisholm D, Sanderson K, Ayuso JL, Saxena S. Reducing the global burden of depression Population-level analysis of intervention cost-effectiveness in 14 world regions. *Br J Psychiatry*. 2004;184:393–403.
11. Christensen H, Pallister E, Smale S, Hickie IB, Calear AL. Community-based prevention programs for anxiety and depression in youth: A systematic review. *J. Prim. Prev*. 2010. p. 139–70.
12. Muñoz RF, Cuijpers P, Smit F, Barrera AZ, Leykin Y. Prevention of major depression [Internet]. *Annu.*

- 1  
2  
3 Rev. Clin. Psychol. 2010. p. 181–212. Available from: [http://www.scopus.com/inward/record.url?eid=2-](http://www.scopus.com/inward/record.url?eid=2-s2.0-77952920303&partnerID=40&md5=77a8bdbcb140a5faf5893b0737fd62c53)  
4 [s2.0-77952920303&partnerID=40&md5=77a8bdbcb140a5faf5893b0737fd62c53](http://www.scopus.com/inward/record.url?eid=2-s2.0-77952920303&partnerID=40&md5=77a8bdbcb140a5faf5893b0737fd62c53)  
5  
6 13. Conejo-Cerón S, Moreno-peral P, Rodríguez-Morejón A, Motrico E, Navas-Campaña D, Rigabert A, et  
7 al. Effectiveness of Psychological and Educational Interventions to Prevent Depression in Primary Care: A  
8 Systematic Review and Meta-Analysis. *Ann Fam Med*. 2017;15:262–71.  
9  
10 14. Hetrick S, Cox G, Merry S. Where to Go from Here? An Exploratory Meta-Analysis of the Most  
11 Promising Approaches to Depression Prevention Programs for Children and Adolescents. *Int J Environ*  
12 *Res Public Health* [Internet]. 2015;12:4758–95. Available from: [http://www.mdpi.com/1660-](http://www.mdpi.com/1660-4601/12/5/4758/)  
13 [4601/12/5/4758/](http://www.mdpi.com/1660-4601/12/5/4758/)  
14  
15 15. Merry S, Hetrick S, Cox G, Brudevold-Iversen T, Bir J, McDowell H. Psychological and educational  
16 interventions for preventing depression in children and adolescents ( Review ). *Cochrane Database Syst*  
17 *Rev*. 2011;7:CD003380.  
18  
19 16. van Zoonen K, Buntrock C, Ebert DD, Smit F, Reynolds CF, Beekman ATF, et al. Preventing the onset  
20 of major depressive disorder: A meta-analytic review of psychological interventions. *Int J Epidemiol*.  
21 2014;43:318–29.  
22  
23 17. Richardson T, Stallard P, Velleman S. Computerised Cognitive Behavioural Therapy for the Prevention  
24 and Treatment of Depression and Anxiety in Children and Adolescents!: A Systematic Review. *Clin Child*  
25 *Fam Psychol Rev*. 2010;13:275–90.  
26  
27 18. Bellón JÁ, Moreno-Peral P, Motrico E, Rodríguez-Morejón A, Fernández A, Serrano-Blanco A, et al.  
28 Effectiveness of psychological and/or educational interventions to prevent the onset of episodes of  
29 depression: A systematic review of systematic reviews and meta-analyses. *Prev Med (Baltim)* [Internet].  
30 Elsevier B.V.; 2015;76:S22–32. Available from:  
31 <http://linkinghub.elsevier.com/retrieve/pii/S0091743514004149>  
32  
33 19. Lewis-Fernández R, Rotheram-borus MJ, Betts VT, Greenman L, Essock SM, Escobar JI, et al.  
34 Rethinking funding priorities in mental health research { . *Br J Psychiatry*. 2016;208:507–9.  
35  
36 20. Gladstone TG, Marko-Holguin M, Rothberg P, Nidetz J, Diehl A, DeFrino DT, et al. An internet-based  
37 adolescent depression preventive intervention: study protocol for a randomized control trial. *Trials*  
38 [Internet]. 2015;16:1–17. Available from: <http://www.trialsjournal.com/content/16/1/203>  
39  
40 21. Hoorelbeke K, Faelens L, Behiels J, Koster EHW. Internet-delivered cognitive control training as a  
41 preventive intervention for remitted depressed patients: Protocol for a randomized controlled trial. *BMC*  
42 *Psychiatry* [Internet]. *BMC Psychiatry*; 2015;15:125. Available from: [http://www.biomedcentral.com/1471-](http://www.biomedcentral.com/1471-244X/15/125)  
43 [244X/15/125](http://www.biomedcentral.com/1471-244X/15/125)  
44  
45 22. Saulsberry A, Marko-Holguin M, Blomeke K, Hinkle C, Fogel J, Gladstone T, et al. Randomized clinical  
46  
47  
48  
49  
50  
51  
52  
53  
54  
55  
56  
57  
58  
59  
60



1  
2  
3 trial of a primary care internet-based intervention to prevent adolescent depression: One-year outcomes. *J*  
4 *Can Acad Child Adolesc Psychiatry*. 2013;22:106–17.

5  
6 23. Noell J, Glasgow RE. Interactive technology applications for behavioral counseling: Issues and  
7 opportunities for health care settings. *Am J Prev Med* [Internet]. 1999;17:269–74. Available from:  
8 <http://www.scopus.com/scopus/inward/record.url?eid=2-s2.0-0033231243&partnerID=40&rel=R8.0.0>

9  
10 24. Ybarra ML, Eaton WW. Internet-based mental health interventions. *Ment Health Serv Res*. 2005;7:75–  
11 87.

12  
13 25. Levy JA, Strombeck R. Health benefits and risks of the internet. *J Med Syst*. 2002;26:495–510.

14  
15 26. Christensen H, Griffiths K. The prevention of depression using the Internet. *Med J Aust*. 2002;7:S122-  
16 5.

17  
18 27. Andersson G, Titov N. Advantages and limitations of Internet-based interventions for common mental  
19 disorders. *World Psychiatry*. 2014;13:4–11.

20  
21 28. Sander L, Rausch L, Baumeister H. Effectiveness of Internet-Based Interventions for the Prevention of  
22 Mental Disorders : A Systematic Review and Meta-Analysis. *JMIR Ment Heal*. 2016;3:e38.

23  
24 29. Zhou T, Li X, Pei Y, Gao J, Kong J. Internet-based cognitive behavioural therapy for subthreshold  
25 depression: A systematic review and meta-analysis. *BMC Psychiatry* [Internet]. *BMC Psychiatry*; 2016;16.  
26 Available from: <http://dx.doi.org/10.1186/s12888-016-1061-9>

27  
28 30. Deady M, Choi I, Calvo RA, Glozier N, Christensen H, Harvey SB. eHealth interventions for the  
29 prevention of depression and anxiety in the general population: A systematic review and meta-analysis.  
30 *BMC Psychiatry*. *BMC Psychiatry*; 2017;17:1–14.

31  
32 31. Buntrock C, Ebert DD, Lehr D, Smit F, Riper H, Berking M, et al. Effect of a Web-Based Guided Self-  
33 help Intervention for Prevention of Major Depression in Adults With Subthreshold Depression: A  
34 Randomized Clinical Trial. *JAMA*. United States; 2016;315:1854–63.

35  
36 32. Imamura K, Kawakami N, Furukawa TA, Matsuyama Y, Shimazu A, Umanodan R, et al. Does Internet-  
37 based cognitive behavioral therapy (iCBT) prevent major depressive episode for workers? A 12-month  
38 follow-up of a randomized controlled trial. *Psychol Med* [Internet]. 2015;45:1907–17. Available from:  
39 <http://www.ncbi.nlm.nih.gov/pubmed>

40  
41 33. Lintvedt OK, Griffiths KM, Sørensen K, Østvik AR, Wang CE a, Eisemann M, et al. Evaluating the  
42 effectiveness and efficacy of unguided internet-based self-help intervention for the prevention of  
43 depression: a randomized controlled trial. *Clin Psychol Psychother* [Internet]. 2013;20:10–27. Available  
44 from: <http://www.ncbi.nlm.nih.gov/pubmed/21887811>

45  
46 34. Morgan AJ, Jorm AF, Mackinnon AJ. Email-based promotion of self-help for subthreshold depression:



- 1  
2  
3 Mood Memos randomised controlled trial. *Br J Psychiatry*. 2012;200:412–8.
- 4  
5 35. Spek V. Internet-based cognitive behavioural therapy for subthreshold depression in people over 50  
6 years old [Internet]. *Psychol. Med.* 2007. Available from: <http://www.ncbi.nlm.nih.gov/pubmed/17466110>
- 7  
8 36. Moher D, Liberati A, Tetzlaff J, Altman DG. Reprint--preferred reporting items for systematic reviews  
9 and meta-analyses: the PRISMA statement. *Phys Ther.* 2009;89:873–80.
- 10  
11 37. Piantadosi S. *Clinical Trials: A Methodological Perspective*. 2nd Editio. John Sons; W&, editor.  
12 Somerset, New Jersey: John Wiley & Sons; 2005.
- 13  
14 38. Fleiss JL. *Statistical Methods for Rates and Proportions*. 2nd Ed. Wiley, editor. New York; 1981.
- 15  
16 39. Duval S, Tweedie R. Trim and Fill: A Simple Funnel-Plot-Based Method. *Biometrics*. 2000;56:455–63.
- 17  
18 40. Begg CB, Mazumdar M. Operating Characteristics of a Rank Correlation Test for Publication Bias.  
19 *Biometrics* [Internet]. 1994;50:1088. Available from: <http://www.jstor.org/stable/2533446?origin=crossref>
- 20  
21 41. Stuck AE, Rubenstein LZ, Wieland D, Vandenbroucke JP, Irwig L, Macaskill P, et al. Bias in meta-  
22 analysis detected by a simple, graphical. *Bmj* [Internet]. 1998;316:469–469. Available from:  
23 <http://www.bmj.com/cgi/doi/10.1136/bmj.316.7129.469>
- 24  
25 42. Jacob Cohen. *Statistical Power Analysis for the Behavioral Sciences*. L. Erlbaum Associates, editor.  
26 1988.
- 27  
28 43. Cates C. Multiple-arm trial data: using a corrected standard error for GIV analyses. Filter Inf overload  
29 better Decis Abstr 23rd Cochrane Colloquium; Vienna, Austria: John Wiley & Sons; 2015.
- 30  
31 44. The Cochrane Collaboration. *Cochrane Handbook for Systematic Reviews of Interventions Version*  
32 5.1.0 [updated March 2011] [Internet]. Higgins J, Green S, editors. 2011. Available from: [www.cochrane-](http://www.cochrane-handbook.org)  
33 [handbook.org](http://www.cochrane-handbook.org)
- 34  
35 45. D'Agostino RB, Belanger A, D'Agostino RB. A suggestion for using powerful and informative tests of  
36 normality. *Am Stat.* 1990;44:316–21.
- 37  
38 46. Knapp G, Hartung J. Improved tests for a random effects meta-regression with a single covariate. *Stat*  
39 *Med.* 2003;22:2693–710.
- 40  
41 47. Higgins JPT, Thompson SG. Controlling the risk of spurious findings from meta-regression. *Stat Med.*  
42 2004;23:1663–82.
- 43  
44 48. Balshem H, Helfand M, Sch??nemann HJ, Oxman AD, Kunz R, Brozek J, et al. GRADE guidelines: 3.  
45 Rating the quality of evidence. *J Clin Epidemiol.* 2011;64:401–6.
- 46  
47  
48  
49  
50  
51  
52  
53  
54  
55  
56  
57  
58  
59  
60

## Supplementary file : PICOS Search Strategy

|       |              |                                                                                                                                                                                                                                                                                                                                                                                                        |
|-------|--------------|--------------------------------------------------------------------------------------------------------------------------------------------------------------------------------------------------------------------------------------------------------------------------------------------------------------------------------------------------------------------------------------------------------|
| PICOS | Population   | No restriction                                                                                                                                                                                                                                                                                                                                                                                         |
|       | Intervention | ("internet"[MeSH Terms] OR "internet"[All Fields] OR web-based OR technology intervention OR "telemedicine"[MeSH Terms] OR "telemedicine"[All Fields] OR "ehealth"[All Fields] OR online OR "social networking"[MeSH Terms] OR ("social"[All Fields] AND "networking"[All Fields]) OR "social networking"[All Fields] OR computer* OR interactive OR "software"[MeSH Terms] OR "software"[All Fields]) |
|       | Comparator   | No restriction                                                                                                                                                                                                                                                                                                                                                                                         |
|       | Outcome      | ("depressive disorder"[MeSH Terms] OR "depressive disorder" OR depress* OR "depression"[MeSH Terms] OR "anxiety"[MeSH Terms] OR "anxiety"[All Fields]) AND prevent*                                                                                                                                                                                                                                    |
|       | Study design | (randomized controlled trial[Publication Type] OR trial[Title/Abstract])                                                                                                                                                                                                                                                                                                                               |

No population and comparator restrictions included in the search strategy. The selection was performed using the inclusion and exclusion criteria.

## PRISMA-P checklist

| Section and topic                  | Item No | Checklist item                                                                                                                                                                                                                                   | Page |
|------------------------------------|---------|--------------------------------------------------------------------------------------------------------------------------------------------------------------------------------------------------------------------------------------------------|------|
| <b>Administrative information</b>  |         |                                                                                                                                                                                                                                                  |      |
| Title:                             |         |                                                                                                                                                                                                                                                  |      |
| Identification                     | 1a      | Identify the report as a protocol of a systematic review                                                                                                                                                                                         | 1    |
| Update                             | 1b      | If the protocol is for an update of a previous systematic review, identify as such                                                                                                                                                               | -    |
| Registration                       | 2       | If registered, provide the name of the registry (such as PROSPERO) and registration number                                                                                                                                                       | 2,5  |
| Authors:                           |         |                                                                                                                                                                                                                                                  |      |
| Contact                            | 3a      | Provide name, institutional affiliation, e-mail address of all protocol authors; provide physical mailing address of corresponding author                                                                                                        | 1    |
| Contributions                      | 3b      | Describe contributions of protocol authors and identify the guarantor of the review                                                                                                                                                              | 10   |
| Amendments                         | 4       | If the protocol represents an amendment of a previously completed or published protocol, identify as such and list changes; otherwise, state plan for documenting important protocol amendments                                                  | -    |
| Support:                           |         |                                                                                                                                                                                                                                                  |      |
| Sources                            | 5a      | Indicate sources of financial or other support for the review                                                                                                                                                                                    | 10   |
| Sponsor                            | 5b      | Provide name for the review funder and/or sponsor                                                                                                                                                                                                | 10   |
| Role of sponsor or funder          | 5c      | Describe roles of funder(s), sponsor(s), and/or institution(s), if any, in developing the protocol                                                                                                                                               | 10   |
| <b>Introduction</b>                |         |                                                                                                                                                                                                                                                  |      |
| Rationale                          | 6       | Describe the rationale for the review in the context of what is already known                                                                                                                                                                    | 4,5  |
| Objectives                         | 7       | Provide an explicit statement of the question(s) the review will address with reference to participants, interventions, comparators, and outcomes (PICO)                                                                                         | 5    |
| <b>Methods</b>                     |         |                                                                                                                                                                                                                                                  |      |
| Eligibility criteria               | 8       | Specify the study characteristics (such as PICO, study design, setting, time frame) and report characteristics (such as years considered, language, publication status) to be used as criteria for eligibility for the review                    | 5    |
| Information sources                | 9       | Describe all intended information sources (such as electronic databases, contact with study authors, trial registers or other grey literature sources) with planned dates of coverage                                                            | 6,7  |
| Search strategy                    | 10      | Present draft of search strategy to be used for at least one electronic database, including planned limits, such that it could be repeated                                                                                                       | 6,7  |
| Study records:                     |         |                                                                                                                                                                                                                                                  |      |
| Data management                    | 11a     | Describe the mechanism(s) that will be used to manage records and data throughout the review                                                                                                                                                     | 7    |
| Selection process                  | 11b     | State the process that will be used for selecting studies (such as two independent reviewers) through each phase of the review (that is, screening, eligibility and inclusion in meta-analysis)                                                  | 7    |
| Data collection process            | 11c     | Describe planned method of extracting data from reports (such as piloting forms, done independently, in duplicate), any processes for obtaining and confirming data from investigators                                                           | 7    |
| Data items                         | 12      | List and define all variables for which data will be sought (such as PICO items, funding sources), any pre-planned data assumptions and simplifications                                                                                          | 7    |
| Outcomes and prioritization        | 13      | List and define all outcomes for which data will be sought, including prioritization of main and additional outcomes, with rationale                                                                                                             | 7,8  |
| Risk of bias in individual studies | 14      | Describe anticipated methods for assessing risk of bias of individual studies, including whether this will be done at the outcome or study level, or both; state how this information will be used in data synthesis                             | 7,8  |
| Data synthesis                     | 15a     | Describe criteria under which study data will be quantitatively synthesized                                                                                                                                                                      | 8,9  |
|                                    | 15b     | If data are appropriate for quantitative synthesis, describe planned summary measures, methods of handling data and methods of combining data from studies, including any planned exploration of consistency (such as $I^2$ , Kendall's $\tau$ ) | 8,9  |
|                                    | 15c     | Describe any proposed additional analyses (such as sensitivity or subgroup analyses, meta-regression)                                                                                                                                            | 8,9  |
|                                    | 15d     | If quantitative synthesis is not appropriate, describe the type of summary planned                                                                                                                                                               | -    |
| Meta-bias(es)                      | 16      | Specify any planned assessment of meta-bias(es) (such as publication bias across studies, selective reporting within studies)                                                                                                                    | 8    |
| Confidence in cumulative evidence  | 17      | Describe how the strength of the body of evidence will be assessed (such as GRADE)                                                                                                                                                               | 9    |
