# Supplementary material for: Effectiveness of online interventions in preventing depression: a protocol for systematic review and meta-analysis of randomised controlled trials
Source: PubMed Central journal article supplement — BMJ Open. 2018 Nov 28;8(11):e022012. doi: 10.1136/bmjopen-2018-022012 (PMC6278812; doi:10.1136/bmjopen-2018-022012), 2018-11-28
Supplement: bmjopen-2018-022012supp001.pdf [file bmjopen-2018-022012supp001.pdf]

Supplementary file : PICOS Search Strategy

|       |              |                                                                                                                                                                                                                                                                                                                                                                                                        |
|-------|--------------|--------------------------------------------------------------------------------------------------------------------------------------------------------------------------------------------------------------------------------------------------------------------------------------------------------------------------------------------------------------------------------------------------------|
| PICOS | Population   | No restriction                                                                                                                                                                                                                                                                                                                                                                                         |
|       | Intervention | ("internet"[MeSH Terms] OR "internet"[All Fields] OR web-based OR technology intervention OR "telemedicine"[MeSH Terms] OR "telemedicine"[All Fields] OR "ehealth"[All Fields] OR online OR "social networking"[MeSH Terms] OR ("social"[All Fields] AND "networking"[All Fields]) OR "social networking"[All Fields] OR computer* OR interactive OR "software"[MeSH Terms] OR "software"[All Fields]) |
|       | Comparator   | No restriction                                                                                                                                                                                                                                                                                                                                                                                         |
|       | Outcome      | ("depressive disorder"[MeSH Terms] OR "depressive disorder" OR depress* OR "depression"[MeSH Terms] OR "anxiety"[MeSH Terms] OR "anxiety"[All Fields]) AND prevent*                                                                                                                                                                                                                                    |
|       | Study design | (randomized controlled trial[Publication Type] OR trial[Title/Abstract])                                                                                                                                                                                                                                                                                                                               |

No population and comparator restrictions included in the search strategy. The selection was performed using the inclusion and exclusion criteria.
